# Supplementary material for: Epigenetic Regulation of Alternative mRNA Splicing in Dilated Cardiomyopathy
Source: MDPI journal article supplement (doi:10.3390/jcm9051499), 2020-05-16

Supplemental Figure 1

A

Heatmap of sample-sample-distances

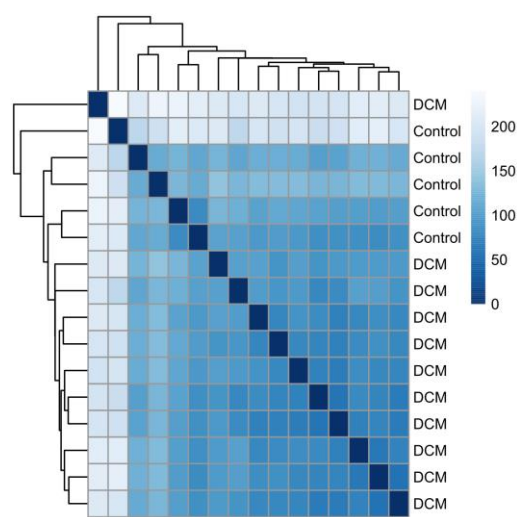

B

PCA plot of the replication cohort

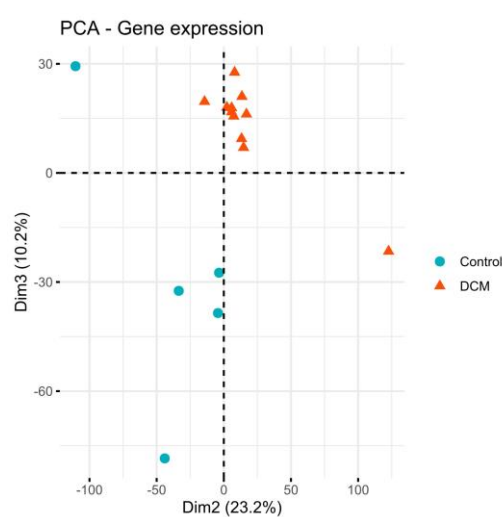

# Supplemental Figure 2

A

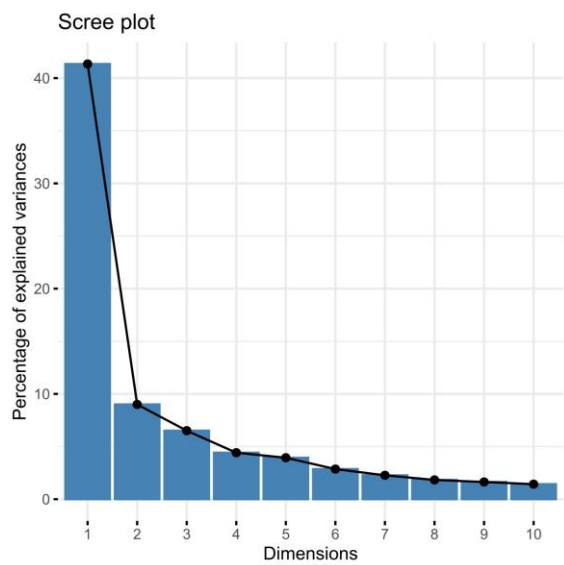

B

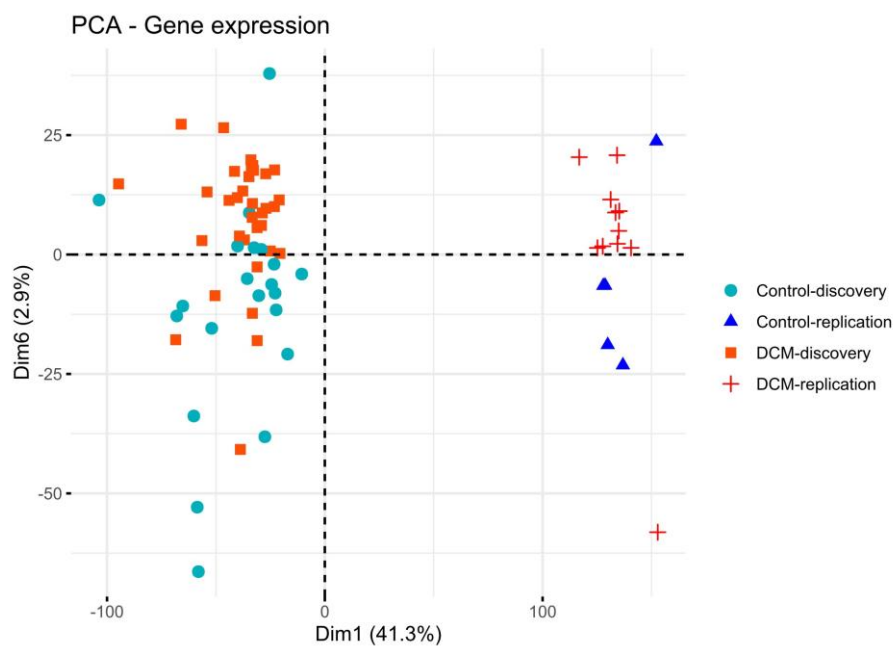

Supplemental Figure 3

A

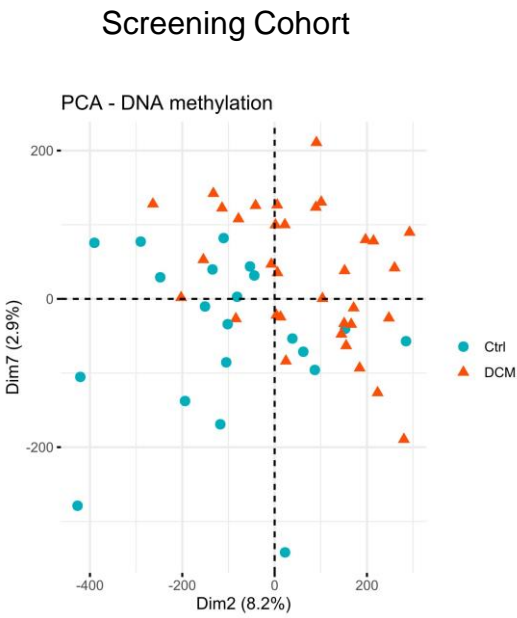

B

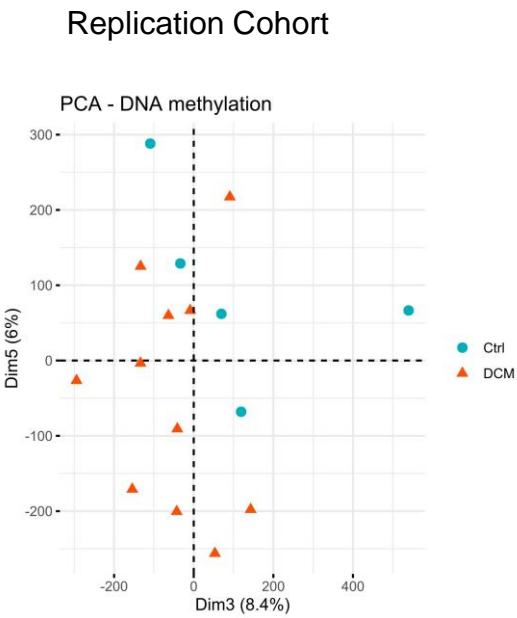

All samples from this study

C

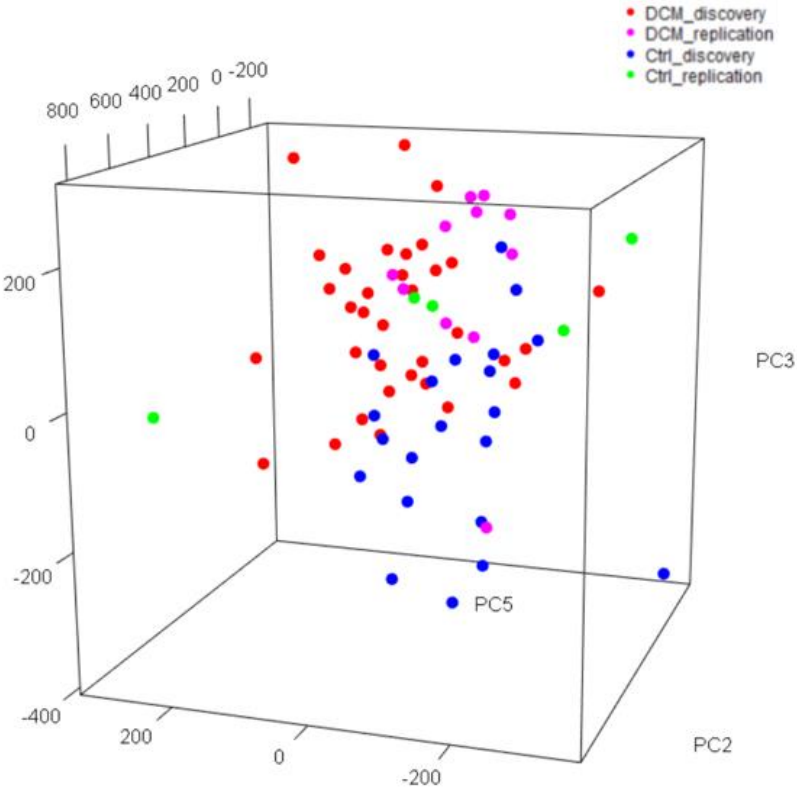

Supplemental Figure 4

A

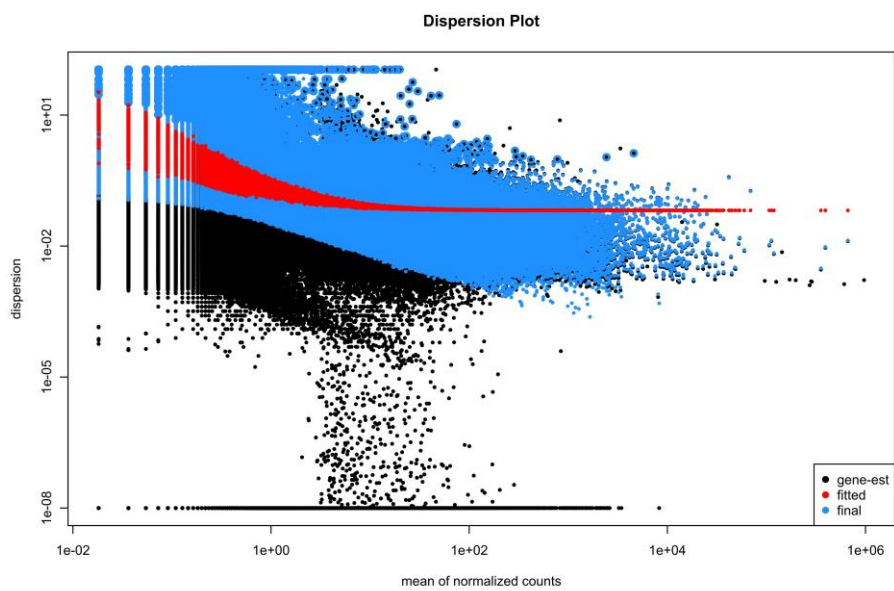

B

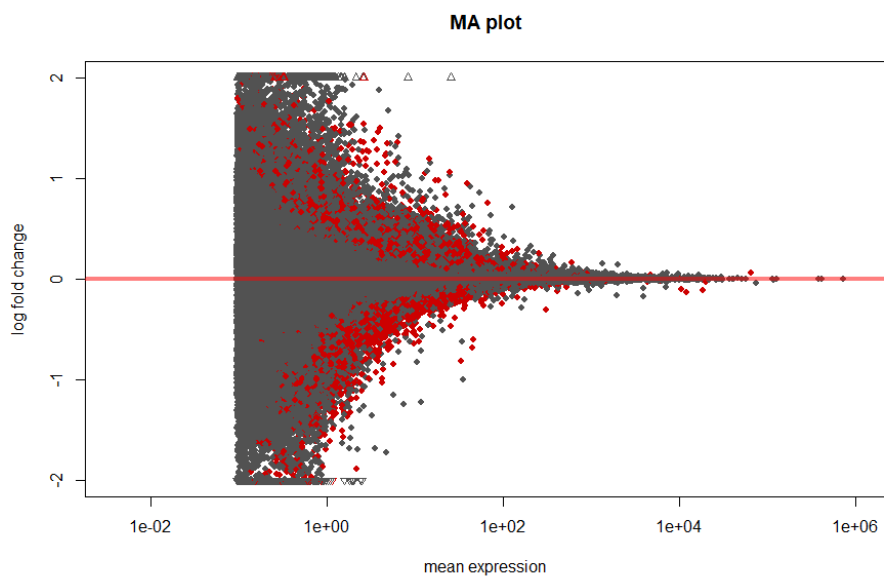

# Supplemental Figure 5

A

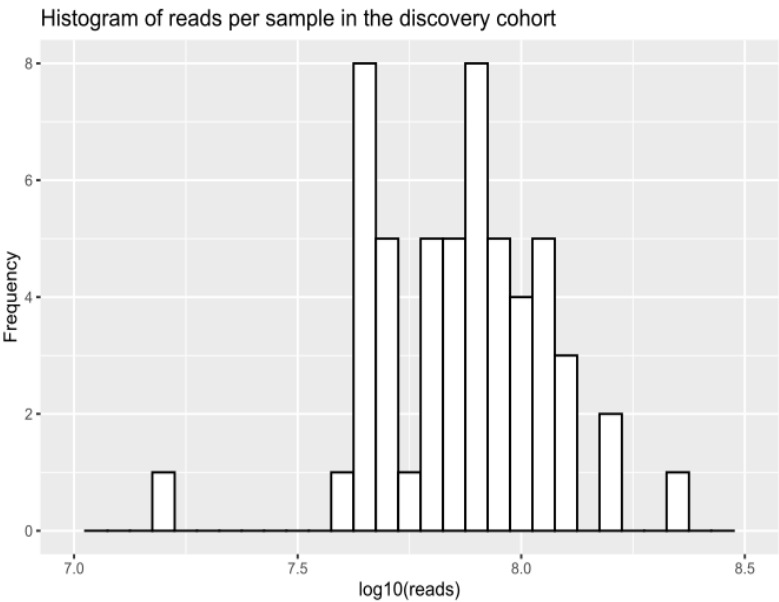

B

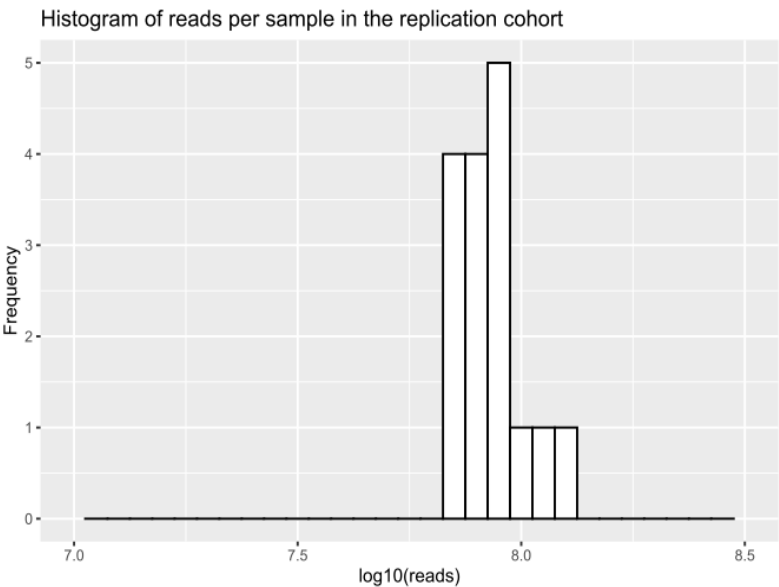

Supplement: s1 [file s1]
